# Supplementary material
Source: PubMed Central journal article supplement (PMC3302316)

SUPPLEMENTARY TABLE 1. Primers used in this study.

| Gene                               | Primer name | Sequence 5'-3'             | Annealing temp. | Extension temp. |
|------------------------------------|-------------|----------------------------|-----------------|-----------------|
| <b>Viral segment qPCR primers</b>  |             |                            |                 |                 |
|                                    | MdSegBRR    | TTCTTAGCAGATGATGTCATCGC    | 55              | 65              |
|                                    | MdSegBLL    | CGTGGATTGACAACGCGTTT       | 55              | 65              |
|                                    | MdSegBRL    | AGCTTATGTCGACAAGCGCT       | 55              | 65              |
|                                    | MdSegBLR2   | TGATTAATTTGTGATACTTCCATGTT | 55              | 65              |
|                                    | PTP-J1F     | CCAATTCGGAAGGGTCTCG        | 52              | 72              |
|                                    | PTP-J1R     | GGGGTAGCACTTTTGTGTTTATCT   | 52              | 72              |
| <b>Gene specific qPCR primers</b>  |             |                            |                 |                 |
| <i>DNA pol δ</i><br>(Locus 4754)   | 4754_F      | ATCGTCTACCCGACGTTTAC       | 55              | 65              |
|                                    | 4754_R      | GTGGGCTATGAACTGGTCGT       | 55              | 65              |
| <i>DNA pol B2</i><br>(Locus 4897)  | 4897_F      | TATACTGCTCCGGGACTTGC       | 55              | 65              |
|                                    | 4897_R      | CAGCCCCGTACAGATTGTTT       | 55              | 65              |
| <i>helicase</i>                    | helicaseF   | TCTTCCAACACACGATTCCA       | 55              | 65              |
|                                    | helicaseR   | AAGAACGCGTACCACCAAAT       | 55              | 65              |
| <i>lef-4</i>                       | lef4qPCRf   | ACCCTTACCAGGACAACCTG       | 55              | 72              |
|                                    | lef4qPCRR   | AAATAGTACGCGCCACCTTG       | 55              | 72              |
| <i>lef-9</i>                       | lef9qPCRf   | CATCTTGATCAGCGTGCAAT       | 55              | 72              |
|                                    | lef9qPCRR   | ACGTCAGTATTCCCCAGCAC       | 55              | 72              |
| <i>p74</i>                         | p74F        | TCGGTAATTGATTGGGGAGA       | 55              | 72              |
|                                    | p74R        | TGCAGCACCAAACAACAAT        | 55              | 72              |
| <i>EF1-α</i>                       | EF1aMdFqPCR | ATTGAAGGCCGAGCGTGAAC       | 52              | 72              |
|                                    | EF1aMdRqPCR | CCGAGGGTGAAAGCAAGGAG       | 52              | 72              |
| <b>Sequence correction primers</b> |             |                            |                 |                 |
| <i>lef-8</i>                       | lef8span_F  | CATGTGCTTTCCAATCATGC       | 55              | 65              |
|                                    | lef8span_R  | TTGACATTTTTGCTTTTGAAGG     | 55              | 65              |
| <i>pif1</i>                        | pif1span_F  | TGTGACCCAGCAGATAACGA       | 55              | 65              |
|                                    | pif1span_R  | TAATTGCCTTCTTGGGTTGG       | 55              | 65              |
| <i>p47</i>                         | p47_F       | TAAGAGCCGTGAATGGTGTG       | 55              | 65              |
|                                    | p47_R       | ATTTACGCCGGTGCATTACT       | 55              | 65              |
| <i>19kda</i>                       | 19k_F       | TCATATAATTCCGACCGACA       | 55              | 65              |
|                                    | 19k_R       | TCGGCTTGCAATTTAGACGTT      | 55              | 65              |
| <i>p74</i>                         | p74span_F   | TCAAAAGCAATCATGAGTATGACA   | 55              | 65              |
|                                    | p74span_R   | TCAGTAACGCGATGTTTCAGG      | 55              | 65              |
| <i>HzNVorf9-1-like</i>             | orf9-1F     | AAAGCGGCGTTTGATAGAAA       | 55              | 65              |
|                                    | orf9-1R     | TGCGATGCATTCTCCTGTTA       | 55              | 65              |
| <i>HzNVorf9-2-like</i>             | orf9-2F     | TGTTACGAATGGCGACTGAA       | 55              | 65              |
|                                    | orf9-2R     | TGGTGTATTCCGAATGTGTGA      | 55              | 65              |
| <i>HzNVorf64</i>                   | orf64F      | ATCGCGACAATACACCAACA       | 55              | 65              |
|                                    | orf64R      | ACAAACCAATGTGGGAAAAA       | 55              | 65              |

SUPPLEMENTARY TABLE 2. *M. demolitor* encapsidated protein coding sequences matching assembled transcript loci

| Accession    | Gene name                       | Locus match | Segment | Adult RPKM | Pupal RPKM |
|--------------|---------------------------------|-------------|---------|------------|------------|
| YP_239362.1* | hypothetical protein 1          | 557         | A       | 186        | 3          |
| YP_239363.1* | hypothetical protein 2          | 557         | A       | 186        | 3          |
| YP_239364.1* | hypothetical protein            | 557         | B       | 186        | 3          |
| YP_239365.1  | hypothetical protein 1          |             | E       |            |            |
| YP_239366.1  | hypothetical protein 2          |             | E       |            |            |
| YP_239367.2  | hypothetical protein 3          |             | E       |            |            |
| YP_239368.1  | viral ankyrin 1                 | 7257        | C       | 8          | 0          |
| YP_239369.1  | viral ankyrin 2                 | 7257        | C       | 8          | 0          |
| YP_239370.1  | hypothetical protein            | 10639       | C       | 3          | 0          |
| YP_239371.1  | hypothetical protein            | 4559        | F       | 6          | 0          |
| YP_239372.1  | viral ankyrin 2                 | 2771        | F       | 68         | 0          |
| YP_239373.1* | viral ankyrin 1                 | 2771        | F       | 68         | 0          |
| YP_239374.1  | PTP                             |             | D       |            |            |
| YP_239375.1* | hypothetical protein 1          | 557         | D       | 186        | 3          |
| YP_239376.1* | hypothetical protein 2          | 557         | D       | 186        | 3          |
| YP_239377.1* | hypothetical protein 1          | 6724        | G       | 5          | 0          |
| YP_239378.1* | hypothetical protein 2          | 6724        | G       | 5          | 0          |
| YP_239379.1* | viral ankyrin 1                 | 6005        | G       | 11         | 0          |
| YP_239380.1* | viral ankyrin 2                 | 6005        | G       | 11         | 0          |
| YP_239381.1  | PTP 1                           | 7122        | H       | 14         | 0          |
| YP_239382.1  | PTP 2                           | 7122        | H       | 14         | 0          |
| YP_239383.1  | PTP 3                           | 7122        | H       | 14         | 0          |
| YP_239384.1* | viral ankyrin                   | 7517        | H       | 9          | 0          |
| YP_239385.1  | PTP 5                           | 7122        | H       | 14         | 0          |
| YP_239386.1* | PTP 4                           | 7473        | H       | 5          | 0          |
| YP_239387.1* | PTP 1                           | 1720        | J       | 105        | 0          |
| YP_239388.1  | viral ankyrin                   | 1720        | J       | 105        | 0          |
| YP_239389.1  | PTP 3                           | 1720        | J       | 105        | 0          |
| YP_239390.1* | PTP 4                           | 2822        | J       | 44         | 0          |
| YP_239391.1* | PTP 2                           | 2822        | J       | 44         | 0          |
| YP_239392.1  | hypothetical protein            | 2107        | K       | 25         | 1          |
| YP_239393.1  | hypothetical protein 2          | 10566       | M       | 6          | 0          |
| YP_239394.1  | hypothetical protein 4          |             | M       |            |            |
| YP_239395.1  | hypothetical protein 3          |             | M       |            |            |
| YP_239396.1  | hypothetical protein 1          | 7109        | M       | 8          | 1          |
| YP_239397.1  | hypothetical protein 5          | 5413        | M       | 15         | 0          |
| YP_239398.1  | hypothetical protein            | 726         | N       | 25         | 0          |
| YP_239399.1* | viral ankyrin 3                 | 726         | N       | 25         | 0          |
| YP_239400.1* | PTP 2                           |             | N       |            |            |
| YP_239401.1  | PTP 3                           | 14728       | N       | very low   | very low   |
| YP_239402.1  | viral ankyrin 1                 | 6097        | N       | 5          | 1          |
| YP_239403.1* | viral ankyrin 2                 | 835         | N       | 1033       | 8          |
| YP_239404.1  | PTP 1                           | 726         | N       | 25         | 0          |
| YP_239405.1  | hypothetical protein            | 557         | L       | 186        | 3          |
| YP_239406.1* | viral ankyrin                   | 2771        | I       | 68         | 0          |
| YP_239407.1  | hypothetical protein MdBV_sIgp2 | 8271        | I       | 14         | 0          |
| YP_239418.1  | Egf1.5                          |             | O       |            |            |
| YP_239420.1  | Egf0.4                          |             | O       |            |            |
| YP_239421.1  | Egf1.0                          |             | O       |            |            |
| YP_239422.1* | Glc1.8                          |             | O       |            |            |

\*Coding sequences correspond to ORFs in the encapsidated genome of MdBV whose expression was detected in adult female *M. demolitor* by Bitra et al. (11).

SUPPLEMENTARY TABLE 3. Similarity of MdBV transcripts to bracovirus, nudivirus and baculovirus genes

| Gene name         | Protein domains (PFAM)                           | MdBV locus                    | H <sub>2</sub> NV-1 ORF name | H <sub>2</sub> NV-1 Identity* | Cc ortholog | Cc Identity* | Ci ortholog | Ci Identity* | Role                                   |
|-------------------|--------------------------------------------------|-------------------------------|------------------------------|-------------------------------|-------------|--------------|-------------|--------------|----------------------------------------|
| <i>dnapol</i>     |                                                  | no hits                       | 131                          |                               |             |              |             |              | DNA replication, repair, recombination |
| <i>helicase</i>   |                                                  | 3891                          | 104                          | 25%                           |             |              |             |              |                                        |
| <i>helicase 2</i> |                                                  | no hits                       | 60                           |                               |             |              |             |              |                                        |
| <i>integrase</i>  | Phage integrase (PF00589.16)                     | 3978                          | 144                          | 30%                           |             |              | CAR40240.1  | 53%          |                                        |
| <i>ligase</i>     |                                                  | 1667                          |                              | no hits                       |             |              |             | 33%          |                                        |
| <i>lef-3</i>      |                                                  | no hits                       | 36                           |                               |             |              |             |              |                                        |
| <i>p47</i>        |                                                  | 703                           | 75                           | 25%                           | CAR31573.1  | 73%          |             |              | Transcription                          |
| <i>lef-4</i>      |                                                  | 2025                          | 98                           | 25%                           |             |              | CAR40187.1  | 55%          |                                        |
| <i>lef-8</i>      | RNA_pol_Rbp2_6 (PF00562.22)                      |                               | 90                           | 33%                           | CAR31572.1  | 87%          | CAR40189.1  | 88%          |                                        |
| <i>lef-9</i>      | RNA_pol_Rpb1_2 (PF00623.14), LEF-9 (PF05094.6)   | 3218                          | 75                           | 32%                           |             |              |             |              |                                        |
| <i>lef-5</i>      | Baculo_LEF5_C (PF11792.2), TFIIS_C (PF101096.12) | 539: transcripts 2,7,8,9      | 101                          | no hits                       | CAT00573.1  | 41%          |             |              |                                        |
| <i>vlf-1</i>      | Phage integrase (PF00589.16)                     | 539: transcripts 1,3,4,5,6,10 | 121                          | 28%                           |             |              | CAR40190.1  | 50%          |                                        |
| <i>p74</i>        | Baculo_p74 (PF04583.6), Baculo_p74_N (PF08404.4) |                               | 11                           | 26%                           | CAR31575.1  | 48%          | CAR40192.1  | 32%          | Oral infectivity                       |
| <i>pf1-1</i>      | PIF (PF05092.6)                                  |                               | 55                           | 28%                           |             |              | CAR40193.1  | 36%          |                                        |
| <i>pf1-2</i>      |                                                  | 226                           | 123                          | 31%                           |             |              | CAR40194.1  | 39%          |                                        |
| <i>pf1-3</i>      | DUF666 (PF05006.6)                               | 767                           | 88                           | 34%                           | CAR31576.1  | 54%          |             |              |                                        |
| <i>l9 kDa</i>     |                                                  | 1791                          | 103                          | 26%                           | CAR31579.1  | 51%          | CAR40196.1  | 37%          | Packaging, assembly, morphogenesis     |
| <i>ac68</i>       |                                                  | no hits                       | 74                           |                               |             |              |             |              |                                        |
| <i>polh/gran</i>  |                                                  | no hits                       | 69                           |                               |             |              |             |              |                                        |
| <i>38K</i>        | DUF705 (PF05152.6)                               | 318                           | 10                           | 41%                           | CAR31574.1  | 69%          | CAR40188.1  | 50%          |                                        |
| <i>vp39</i>       |                                                  | 13843                         | 89                           | no hits                       | CAR31585.1  | 62%          | CAR40200.1  | 44%          | Unknown function                       |
| <i>odv-e56-1</i>  |                                                  |                               | 76                           | no hits                       | CAR31577.1  | 37%          | CAR40195.1  | 27%          |                                        |
| <i>odv-e56-2</i>  | Baculo_E56 (PF04639.6)                           | 1447                          |                              | no hits                       |             | 30%          |             | 23%          |                                        |
| <i>vp91</i>       | CBM_14 (PF01607.18)                              | 1083                          | 46                           | 28%                           | CAR31578.1  | 47%          |             | 30%          |                                        |
| <i>ac81</i>       |                                                  | 4098                          | 33                           | no hits                       |             |              | CAR40191.1  | 32%          |                                        |
| <i>ac92</i>       | Evr1_A1r (PF04777.7)                             | no hits                       | 13                           | 29%                           |             |              |             |              |                                        |
| <i>odv-e66</i>    |                                                  | 2756                          |                              |                               |             |              |             |              |                                        |
|                   |                                                  | 175                           |                              |                               | CAR31580.1  | 32%          | CAR40197.1  | 39%          |                                        |
|                   |                                                  | 1139                          |                              |                               |             |              |             | 35%          |                                        |
|                   |                                                  | 2331                          |                              |                               |             |              |             | 26%          |                                        |

|                                 |                    |             |         |            |     |            |  |     |     |
|---------------------------------|--------------------|-------------|---------|------------|-----|------------|--|-----|-----|
|                                 | 4186               |             |         |            |     |            |  |     | 31% |
| <i>HENIorf9-2</i>               | 2730               | 9           | 20%     | CAR31583.1 | 83% | CAR40199.1 |  | 36% |     |
| <i>HENIorf9-1</i>               |                    |             | no hits | CAR31582.1 | 92% | CAR40198.1 |  | 54% |     |
| <i>HENIorf64</i>                | 318                | 64          | 21%     | CAR31584.1 | 86% |            |  | 67% |     |
| <i>HENIorf94</i>                | 94                 | 94          |         | CAR82240.1 | 74% |            |  |     |     |
| <i>HENIorf106</i>               | 332                | 106         | no hits | CAR31586.1 | 94% | CAR40201.1 |  | 61% |     |
| <i>HENIorf128</i>               | 1167               | 128         | no hits | CAR31587.1 | 74% | CAR40202.1 |  | 52% |     |
| <i>HENIorf140</i>               | 3488               | 140         | 26%     | CAR31588.1 | 55% | CAR40203.1 |  | 37% |     |
|                                 | 2966               |             | no hits |            | 25% |            |  | 41% |     |
|                                 | 2965               |             | no hits |            | 32% |            |  | 40% |     |
| <i>PmY hypothetical protein</i> | 756                | -           |         | CAR31589.1 | 76% | CAR40204.1 |  | 42% |     |
| <i>Ce50C22.5*</i>               | 3938               | -           |         | CAR82243.1 | 66% |            |  |     |     |
|                                 | 1624               |             |         |            | 68% |            |  |     |     |
|                                 | 4428               |             |         |            | 63% |            |  |     |     |
|                                 | 2935               |             |         |            | 57% |            |  |     |     |
| <i>Ce50C22.3</i>                | 370                | -           |         | CAR82241.1 | 62% |            |  |     |     |
| <i>Ce50C22.6*</i>               | 5905               |             |         | CAR82244.1 | 36% |            |  |     |     |
|                                 | 2485               |             |         |            | 44% |            |  |     |     |
| <i>27b (Ce50C22.7)</i>          | 2287               | -           |         | CAR82245.1 | 72% | CBH32500.1 |  | 37% |     |
| <i>AcMNPV p26</i>               | 30882 (two copies) | YP_717557.1 | 30%     |            |     |            |  |     |     |
| <i>AcMNPV p94</i>               | 8308               | NP_054164   | 35%     |            |     |            |  |     |     |
|                                 | 2884, transcript   |             | 36%     |            |     |            |  |     |     |
|                                 | 4, 5               |             |         |            |     |            |  |     |     |

\*genes were fragmented in assembly

SUPPLEMENTARY TABLE 4. Alignment of *M. demolitor* transcripts to orthologs shows that some genes have duplicated

| Gene name         | MdBV locus | Alignment ortholog species | Alignment ortholog name | Alignment ortholog length (amino acids) | Alignment positions |
|-------------------|------------|----------------------------|-------------------------|-----------------------------------------|---------------------|
| <i>integrase</i>  | 3978       | <i>C. inanitus</i>         | CAR40240.1              | 228                                     | 1-215               |
|                   | 1667       |                            |                         |                                         | 15-208              |
| <i>odv-e56</i>    | 13843      | <i>C. inanitus</i>         | CAR40195.1              | 425                                     | 269-393             |
|                   | 1447       |                            |                         |                                         | 268-393             |
|                   | 1083       |                            |                         |                                         | 304-358             |
| <i>ac92</i>       | 5801       | <i>HzNV-1</i>              | NP_690432.1             | 244                                     | 76-229              |
|                   | 2756       |                            |                         |                                         | 38-239              |
| <i>odv-e66</i>    | 175        | <i>C. inanitus</i>         | CAR40197.1              | 637                                     | 100-636             |
|                   | 195        |                            |                         |                                         | 208-337             |
|                   | 337        |                            |                         |                                         | 388-579             |
|                   | 358        |                            |                         |                                         | 309-373             |
|                   | 431        |                            |                         |                                         | 114-231             |
|                   | 457        |                            |                         |                                         | 48-394              |
|                   | 645        |                            |                         |                                         | -                   |
|                   | 966        |                            |                         |                                         | 41-498              |
|                   | 1139       |                            |                         |                                         | 72-636              |
|                   | 1317       |                            |                         |                                         | 151-205             |
|                   | 1374       |                            |                         |                                         | 193-228             |
|                   | 1513       |                            |                         |                                         | 92-198              |
|                   | 1593       |                            |                         |                                         | 251-331             |
|                   | 1844       |                            |                         |                                         | -                   |
|                   | 2109       |                            |                         |                                         | 318-400             |
|                   | 2114       |                            |                         |                                         | 406-636             |
|                   | 2199       |                            |                         |                                         | 176-238             |
|                   | 2331       |                            |                         |                                         | 90-636              |
|                   | 2630       |                            |                         |                                         | -                   |
|                   | 2730       |                            |                         |                                         | 175-636             |
|                   | 2921       |                            |                         |                                         | 315-422             |
|                   | 3972       |                            |                         |                                         | 62-249              |
|                   | 4186       |                            |                         |                                         | 47-636              |
|                   | 4698       |                            |                         |                                         | 165-332             |
|                   | 5629       |                            |                         |                                         | 21-331              |
|                   | 5944       |                            |                         |                                         | 85-239              |
|                   | 5960       |                            |                         |                                         | 169-237             |
|                   | 11088      |                            |                         |                                         | 176-245             |
|                   | 16896      |                            |                         |                                         | 218-401             |
|                   | 23197      |                            |                         |                                         | 479-636             |
| <i>HzNVorf9-2</i> |            | <i>C. congregata</i>       | CAR31583.1              | 237                                     | 3-227               |
| <i>HzNVorf9-1</i> |            |                            | CAR31582.1              | 238                                     | 33-238              |
| <i>HzNVorf140</i> | 3488       | <i>HzNV-1</i>              | NP_690559.1             | 811                                     | 3-293               |
|                   | 2966       |                            |                         |                                         | 139-289             |
|                   | 2965       |                            |                         |                                         | 42-139              |
| <i>35a</i>        | 417        | <i>C. inanitus</i>         | CBA62630.1              | 322                                     | 12-236              |
|                   | 420        |                            |                         |                                         | 141-233             |
|                   | 615        |                            |                         |                                         | 12-220              |

SUPPLEMENTARY TABLE 4. Matches to *Glyptapanteles flavicoxis* DNA polymerase B2 domain-containing protein (ACE75264.1, 1228 amino acids)\*

| Locus | Transcript length | Subject match coordinates | % similarity | % subject coverage | Adult mean RPKM | Pupal mean RPKM | <i>p</i> -value |
|-------|-------------------|---------------------------|--------------|--------------------|-----------------|-----------------|-----------------|
| 10019 | 522               | 445-617                   | 56           | 14                 | 4               | 0               | 4.4e-06         |
| 10180 | 717               | 669-883                   | 53           | 17                 | very low        | very low        |                 |
| 10361 | 573               | 134-313                   | 47           | 15                 | very low        | very low        |                 |
| 10553 | 866               | 625-789                   | 68           | 13                 | very low        | very low        |                 |
| 10756 | 2659              | 257-1140                  | 60           | 72                 | 2               | 2               | n.s.            |
| 11498 | 816               | 472-664                   | 57           | 16                 | very low        | very low        |                 |
| 12184 | 857               | 467-648                   | 51           | 15                 | 3               | 0               | 3.3e-06         |
| 12231 | 317               | 871-975                   | 78           | 8                  | 10              | 0               | 9.7e-10         |
| 12242 | 835               | 271-486                   | 57           | 18                 | 2               | 0               | 0.0001          |
| 12338 | 328               | 410-518                   | 55           | 9                  | very low        | very low        |                 |
| 12633 | 416               | 1114-1220                 | 71           | 9                  | 7               | 0               | 6.2e-06         |
| 12728 | 630               | 859-1067                  | 74           | 17                 | 3               | 0               | 2.5e-05         |
| 12920 | 556               | 374-558                   | 54           | 15                 | very low        | very low        |                 |
| 12987 | 220               | 768-835                   | 82           | 5                  | 4               | 0               | 0.0001          |
| 13718 | 554               | 699-881                   | 69           | 15                 | 5               | 1               | 2.4e-06         |
| 13723 | 1191              | 483-881                   | 67           | 32                 | 5               | 0               | 2.4e-06         |
| 14648 | 287               | 813-905                   | 65           | 7                  | 4               | 0               | 2.3e-08         |
| 14805 | 395               | 949-1020                  | 72           | 6                  | 2               | 0               | 0.0008          |
| 15304 | 543               | 803-852                   | 55           | 4                  | 4               | 0               | 3.7e-05         |
| 15419 | 798               | 567-796                   | 59           | 19                 | 2               | 0               | 3.5e-05         |
| 15463 | 380               | 364-481                   | 59           | 10                 | 2               | 0               | 6.2e-07         |
| 15469 | 845               | 38-288                    | 50           | 20                 | very low        | very low        |                 |
| 15652 | 227               | 394-469                   | 53           | 6                  | very low        | very low        |                 |
| 16000 | 276               | 40-132                    | 48           | 7                  | 5               | 0               | 3.2e-06         |
| 17404 | 1131              | 866-1215                  | 65           | 28                 | very low        | very low        |                 |
| 17698 | 229               | 429-502                   | 54           | 6                  | very low        | very low        |                 |
| 17737 | 489               | 185-297                   | 46           | 9                  | very low        | very low        |                 |
| 18235 | 312               | 739-840                   | 73           | 8                  | 3               | 0               | 3.3e-06         |
| 18411 | 395               | 1056-1180                 | 60           | 10                 | very low        | very low        |                 |
| 21801 | 259               | 823-905                   | 64           | 7                  | 3               | 0               | 0.001           |
| 22047 | 278               | 780-872                   | 63           | 7                  | very low        | very low        |                 |
| 22230 | 429               | 167-297                   | 52           | 11                 | 2               | 0               | 1.3e-05         |
| 23289 | 225               | 768-840                   | 64           | 6                  | very low        | very low        |                 |
| 23368 | 651               | 636-812                   | 65           | 14                 | very low        | very low        |                 |
| 23714 | 467               | 910-998                   | 73           | 7                  | very low        | very low        |                 |
| 27221 | 447               | 29-126                    | 46           | 8                  | very low        | very low        |                 |
| 28411 | 336               | 1038-1148                 | 71           | 9                  | 2               | 0               | 0.0008          |
| 29048 | 227               | 690-764                   | 78           | 6                  | very low        | very low        |                 |
| 29170 | 265               | 424-511                   | 50           | 7                  | very low        | very low        |                 |

|              |      |                 |    |    |          |          |         |
|--------------|------|-----------------|----|----|----------|----------|---------|
| <u>33517</u> | 265  | <u>51-139</u>   | 47 | 7  | very low | very low |         |
| 40086        | 328  | 898-1005        | 75 | 9  | 2        | 0        | 0.0002  |
| <u>4358</u>  | 2787 | <u>310-1215</u> | 68 | 74 | 16       | 5        | 2.0e-08 |
| <u>4897</u>  | 1364 | <u>704-1152</u> | 73 | 36 | 94       | 0        | 1.5e-09 |
| 6255         | 1302 | 3-268           | 40 | 22 | 1        | 1        | n.s.    |
| <u>7467</u>  | 2645 | <u>296-673</u>  | 57 | 31 | 14       | 3        | 3.3e-06 |
| 7500         | 548  | 1056-1215       | 70 | 13 | 14       | 1        | 2.4e-06 |
| <u>8326</u>  | 280  | <u>362-543</u>  | 55 | 15 | 12       | 0        | 3.2e-05 |
| 8541         | 1049 | 38-327          | 46 | 24 | 11       | 2        | 1.4e-07 |
| <u>8689</u>  | 634  | <u>602-812</u>  | 69 | 17 | 10       | 1        | 9.4e-07 |
| 8921         | 537  | 175-343         | 51 | 14 | 5        | 0        | 2.7e-05 |
| <u>9130</u>  | 1833 | <u>622-1215</u> | 68 | 48 | 7        | 0        | 7.8e-08 |
| <u>9136</u>  | 462  | <u>625-777</u>  | 68 | 12 | 4        | 0        | 1.6e-05 |

\*Loci with DNA\_pol\_B\_2 HMM hits are underlined.

SUPPLEMENTARY FIG. 1. Diagram showing the qPCR primers and products used to differentiate between integrated, episomal, and rejoined DNAs from the *M. demolitor* encapsidated Segment B. Primer names correspond to the sequences listed in Supplementary Table 1. The upper part of the panel shows Segment B integrated into the wasp chromosome. When excision occurs, Segment B circularizes, creating the episomal form of the segment. The DNA previously flanking the integrated form of Segment B is rejoined at the sites of Segment B excision.

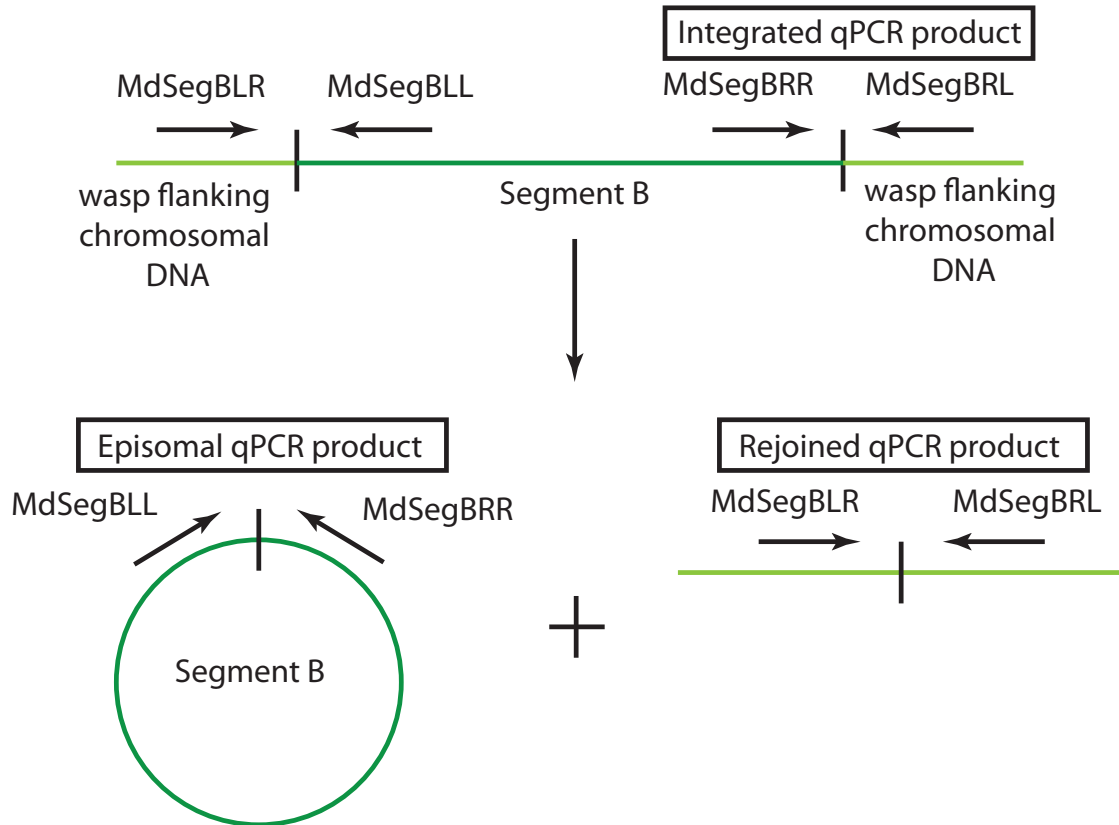



SUPPLEMENTARY FIG. 2. Maximum likelihood tree based upon the *vlf-1*, *integrase* (*HzNVorf144*), and *HzNVorf140* genes in other BVs and nudiviruses. Genes within yellow boxes have intact phage\_integrase (PF00589.16) domains. Numbers at nodes represent bootstrap replicates (nodes without bootstrap support > 75 are not shown). The loci identified from the *M. demolitor* transcriptome are from this study and indicated in red while orthologs from other BV-carrying wasps or nudiviruses are indicated in black. Nudivirus taxa are *Heliothis zea* Nudivirus 1 (*HzNV-1*), *Gryllus bimaculatus* Nudivirus (*GbNV*), *Oryctes rhinocerus* Nudivirus (*OrNV*), *Penaeus monodon* Nudivirus (*PmNV*) and *Autographa californica* Multiple Nucleopolyhedrosis Virus (*AcMNPV*). *Vlf-1* from the baculovirus *AcMNPV* served as the outgroup.

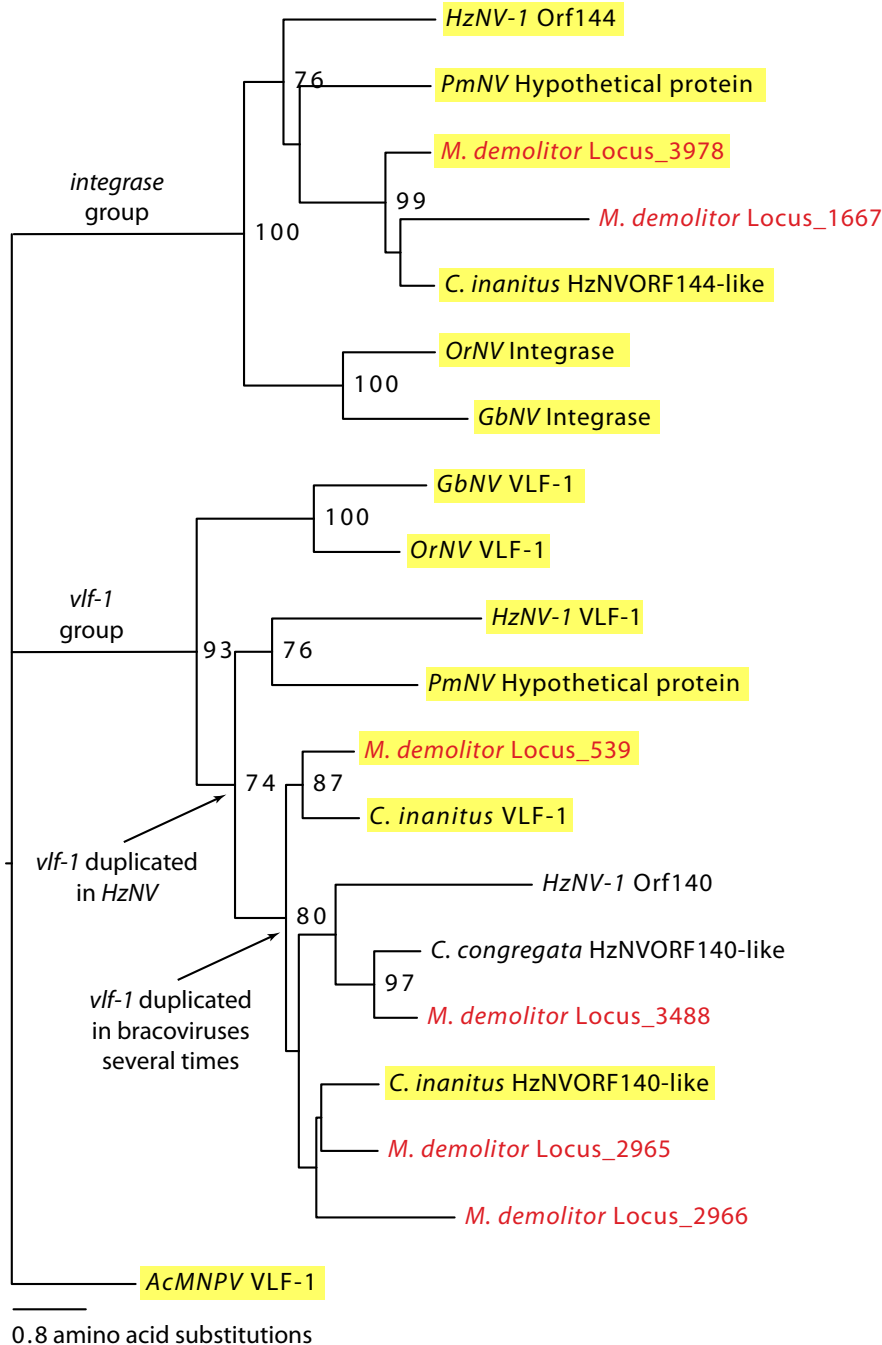

Supplement: supp_86.6.3293_SuppFile.pdf [file supp_86.6.3293_SuppFile.pdf]
